# Supplementary material for: Association of Reactive Oxygen Species-Mediated Signal Transduction with In Vitro Apoptosis Sensitivity in Chronic Lymphocytic Leukemia B Cells
Source: PLoS One. 2011 Oct 10;6(10):e24592. doi: 10.1371/journal.pone.0024592 (PMC3189964; doi:10.1371/journal.pone.0024592)
Supplement: Table S1 — (DOCX) [file pone.0024592.s006.docx]

| |  | Ax488 | PE | Ax647 | | --- | --- | --- | --- | | Signaling Panel 1 | p-Akt(S473)* | p-Syk(Y352)/p-ZAP70(Y319) | p-BLNK(Y84) | | Signaling Panel 2 | p-S6(S235/S236)* | p-PLCγ2(Y759) | p-LcK(Y505) | | Signaling Panel 3 | p-ErK(T202/Y204) | Empty | SHP-1** (2° Goat-anti-rabbit-Ax647) | | Signaling Panel 4 | SHP-2* (2° Goat-anti-rabbitAx488) | p-Stat 5(Y694) | p65/RelA(S529) | |  | FITC | PE | Ax647 | | Apoptosis Panel 1 | Cleaved Caspase 3 | Cleaved PARP | Cytochrome C | | Apoptosis Panel 2 | Empty | Cleaved PARP | p-Chk2(T68)* (2° GaR-Ax647) | |  | FITC | PE | APC | | Phenotypic Panel 1 | IgM | IgD | IgG | | Phenotypic Panel 2 | λ-light chain | κ-light chain | CD38 | | Phenotypic Panel 3 | CD45 | CD79β | CD22 | | B cell gating Panel | CD3-Pacific Blue | CD20-PerCPCy5.5 | CD5-biotin (Q-dot streptavidin) | |
| --- | --- | --- | --- | --- | --- | --- | --- | --- | --- | --- | --- | --- | --- | --- | --- | --- | --- | --- | --- | --- | --- | --- | --- | --- | --- | --- | --- | --- | --- | --- | --- | --- | --- | --- | --- | --- | --- | --- | --- | --- | --- | --- | --- | --- | --- | --- | --- | --- | --- | --- | --- | --- |
